# Supplementary material for: Monthly trends of methane emissions in Los Angeles from 2011 to 2015 inferred by CLARS-FTS observations
Source: Copernicus journal article supplement (doi:10.5194/acp-2016-232), 2016-04-29
Supplement: Supplementary file 1 [file acp-2016-232-supplement.pdf]

1 **Supplemental material**

2 Table S1. Lists of  $XCH_{4(XS)} - XCO_{2(XS)}$  regression slopes (R), uncertainties (R\_err), Hestia CO<sub>2</sub>  
 3 emissions (ECO<sub>2</sub>), inferred CH<sub>4</sub> emissions (ECH<sub>4</sub>), and uncertainties (ECH<sub>4\_err</sub>) for the South  
 4 Coast Air Basin from September 2011 to August 2015.

| Month  | R<br>(ppb/ppm) | R_err<br>(ppb/ppm) | Hestia ECO <sub>2</sub><br>(Tg/month) | ECH <sub>4</sub><br>(Gg/month) | ECH <sub>4_err</sub><br>(Gg/month) |
|--------|----------------|--------------------|---------------------------------------|--------------------------------|------------------------------------|
| Sep-11 | 5.9            | 0.3                | 11.9                                  | 25.4                           | 2.8                                |
| Oct-11 | 6.7            | 0.2                | 11.8                                  | 29.0                           | 3.1                                |
| Nov-11 | 6.3            | 0.2                | 12.2                                  | 27.9                           | 3.0                                |
| Dec-11 | 6.8            | 0.3                | 13.8                                  | 33.8                           | 3.6                                |
| Jan-12 | 6.3            | 0.1                | 14.1                                  | 32.3                           | 3.2                                |
| Feb-12 | 6.4            | 0.2                | 12.7                                  | 29.7                           | 3.1                                |
| Mar-12 | 5.9            | 0.2                | 13.0                                  | 27.9                           | 3.0                                |
| Apr-12 | 6.3            | 0.1                | 12.3                                  | 28.2                           | 2.9                                |
| May-12 | 5.8            | 0.2                | 12.4                                  | 26.1                           | 2.7                                |
| Jun-12 | 5.9            | 0.2                | 12.1                                  | 25.8                           | 2.7                                |
| Jul-12 | 6.0            | 0.2                | 12.2                                  | 26.6                           | 2.8                                |
| Aug-12 | 7.4            | 0.3                | 13.1                                  | 35.2                           | 3.8                                |
| Sep-12 | 6.7            | 0.2                | 12.5                                  | 30.6                           | 3.1                                |
| Oct-12 | 6.2            | 0.1                | 12.7                                  | 28.5                           | 2.9                                |
| Nov-12 | 5.8            | 0.1                | 12.6                                  | 26.4                           | 2.7                                |
| Dec-12 | 7.8            | 1.0                | 13.7                                  | 38.7                           | 6.4                                |
| Jan-13 | 6.5            | 0.2                | 14.1                                  | 33.7                           | 3.5                                |
| Feb-13 | 6.8            | 0.1                | 12.6                                  | 31.2                           | 3.2                                |
| Mar-13 | 6.4            | 0.1                | 12.9                                  | 29.9                           | 3.0                                |
| Apr-13 | 6.2            | 0.1                | 12.1                                  | 27.2                           | 2.8                                |
| May-13 | 6.1            | 0.2                | 12.0                                  | 26.7                           | 2.9                                |
| Jun-13 | 5.6            | 0.2                | 11.7                                  | 24.1                           | 2.5                                |
| Jul-13 | 6.3            | 0.2                | 12.1                                  | 27.8                           | 2.9                                |
| Aug-13 | 6.4            | 0.1                | 12.8                                  | 29.7                           | 3.0                                |
| Sep-13 | 6.9            | 0.1                | 12.3                                  | 30.6                           | 3.1                                |
| Oct-13 | 6.6            | 0.1                | 12.3                                  | 29.7                           | 3.0                                |
| Nov-13 | 7.2            | 0.3                | 12.5                                  | 32.4                           | 3.5                                |
| Dec-13 | 6.5            | 0.1                | 13.8                                  | 32.5                           | 3.3                                |
| Jan-14 | 6.8            | 0.1                | 13.4                                  | 33.2                           | 3.4                                |
| Feb-14 | 6.5            | 0.2                | 11.9                                  | 28.4                           | 2.9                                |
| Mar-14 | 5.4            | 0.4                | 12.2                                  | 23.9                           | 3.0                                |
| Apr-14 | 6.3            | 0.1                | 11.5                                  | 26.3                           | 2.7                                |
| May-14 | 6.1            | 0.1                | 11.4                                  | 25.2                           | 2.5                                |
| Jun-14 | 6.5            | 0.1                | 11.1                                  | 26.1                           | 2.7                                |
| Jul-14 | 6.6            | 0.2                | 11.4                                  | 27.3                           | 2.8                                |
| Aug-14 | 7.1            | 0.2                | 12.1                                  | 31.1                           | 3.2                                |
| Sep-14 | 7.3            | 0.2                | 11.6                                  | 30.6                           | 3.2                                |
| Oct-14 | 6.6            | 0.2                | 11.6                                  | 28.1                           | 3.0                                |
| Nov-14 | 7.3            | 0.2                | 11.8                                  | 31.2                           | 3.2                                |
| Dec-14 | 6.3            | 0.3                | 13.0                                  | 29.9                           | 3.3                                |

|        |     |     |      |      |     |
|--------|-----|-----|------|------|-----|
| Jan-15 | 6.7 | 0.2 | 13.2 | 32.0 | 3.3 |
| Feb-15 | 6.5 | 0.2 | 11.8 | 27.8 | 2.9 |
| Mar-15 | 6.3 | 0.1 | 12.0 | 27.6 | 2.8 |
| Apr-15 | 6.0 | 0.1 | 11.3 | 24.7 | 2.5 |
| May-15 | 6.6 | 0.2 | 11.2 | 27.0 | 2.8 |
| Jun-15 | 5.9 | 0.2 | 10.9 | 23.4 | 2.4 |
| Jul-15 | 6.1 | 0.3 | 11.3 | 24.9 | 2.8 |
| Aug-15 | 7.1 | 0.3 | 11.9 | 30.5 | 3.3 |

1  
2

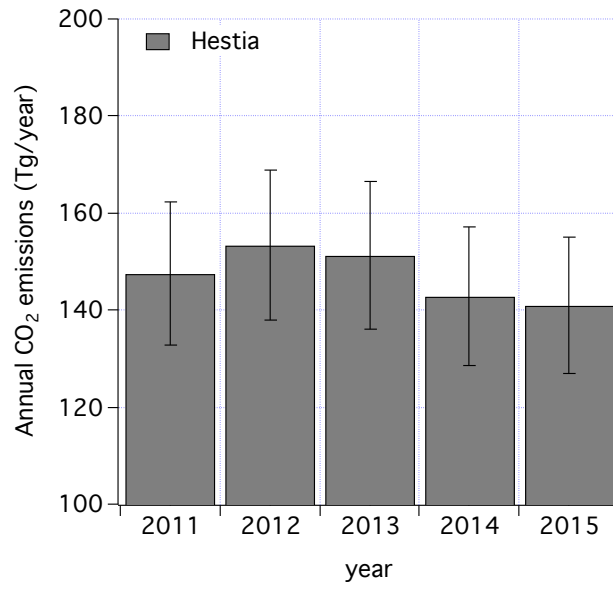

1  
2  
3  
4  
5  
6  
7  
8  
9

Figure S1. Hestia annual CO<sub>2</sub> emissions (in units of Tg per year) from the South Coast Air Basin from 2011 to 2015 (<http://hestia.project.asu.edu>). Emissions from 2013 to 2015 were extrapolated using statewide fuel consumption data provided by the Energy Information Administration.
